# Supplementary material for: Lepidopteran wing scales contain abundant cross-linked film-forming histidine-rich cuticular proteins
Source: Commun Biol. 2021 Apr 22;4:491. doi: 10.1038/s42003-021-01996-4 (PMC8062583; doi:10.1038/s42003-021-01996-4)
Supplement: Supplementary file 6 — Supplementary Data 3 [file 42003_2021_1996_MOESM6_ESM.xlsx]

## Sheet: 工作表1
Supplementary Data 3. Proteins identified from P8-1wing scales listed by iBAQ
ProteinID in Kaikobase	Description	No of identified Peptides	Unique peptides	Sequence coverage [%]	iBAQ P8_1	unreliable*	Trancripts level(EST count)**
Gene010997	BmorCPG31	7	7	24.8	25547000000		Wing145
Gene012979	Bmor CPG41	3	3	27	21544000000		Wing155
Gene003538	Hypothetical protein KGM	12	12	73.8	21345000000		Br380;Em:270;Tes110;Mp:40;Ep40;
Gene011414	Drosophila Retinin like protein	3	3	50.5	18661000000		Wg30; Phg:1
Gene009269	Apolipophorin-3	23	23	73.7	9567900000		Em:240;Br:225;Ca45;Ph35;Ep25; Oc25;Wg15;
Gene000862	BmorCPCFC	5	5	79.8	8615800000		Wg34;An22,Mxg23;Ce8;Wg6;Ep3;
Gene015750	BmorCPR135	16	16	87.5	6440400000		Wg2
Gene001846	BmorCPR57	5	5	21.5	6383800000		Wing78
Gene010486	BmorCPG38	15	14	28.9	4494400000		Wg58;
Gene013248;Gene013247	BmorCPFL3-2	3	3	27.4	3903400000		Wg497; An 3; Ce17; Ep3
Gene013570	Uncharacterized protein LOC101741978	9	9	73.6	3617500000		Wg67;Ep38;An18;Mxg17;Wd15;Em14; Ce8;Br4;
Gene011131	Chemosensory protein 10 isoform X1	6	6	47.7	2444500000		Wg23;An3;Em2;Tes1;
Gene013165	BmorCPF	2	2	28.3	2406400000		Wg500
Gene009982	BmorCPR74	6	6	52.7	2336300000		Wg140;
Gene011501;Gene011500	30kDa protein	16	9	60.9	2227000000		Br2; Tes1;Ep1
Gene010938	Sensory appendage protein 3	2	2	30.8	2191400000		unkown
Gene000989	BmorCPH4	3	3	18.6	2085500000		An82;Mxg78;Cal66;Ce35;
Gene004306	BmorCPT3	5	4	26.1	2033400000		Ep160;Wg99;Wd15;
Gene015734	BmorCPR137	6	6	34.5	1937900000		Wg39
Gene011870	BmorCPG20	3	3	44.7	1862900000		Wg48;Ep26
Gene005257;Gene005256	BmorCPLCP12	32	28	70.4	1649500000		Wd149;Ep48;Ce16
Gene003925	BmorCPR73	6	6	53.4	1626100000		Wg415;
Gene009536	BmorCPH30	7	7	84.3	1497900000		Wg119;Mxg100;An101;Cal28;Ep7;
Gene008225	Fibrohexamerin-like	6	6	24.6	1331400000		Wg8;Tes3;
Gene009992;Gene009993	Actin, cytoplasmic A3a	17	4	60.1	1152800000		Mp46;Mg:42;Wg38;Wd37;Em22;Sg16;Cell:12;Ca:12;Phg:9;et al
Gene011502;Gene011503	30K protein 1	14	7	50	1151900000		Br2; Tes1;Ep1
Gene009460	Alpha-tocopherol transfer protein-like	28	24	83.3	1132500000		Wg48;Br2;
Gene012518	BmorCPR152	2	2	15.3	1112900000		Wg27;
Gene002358	Adenylate cyclase, terminal-differentiation specific-like	22	22	68.7	1104800000
Gene008647	BmorCPAP3-A2	12	12	55.2	1089400000		Wg13;Br2;
Gene012506	BmorCPR91	4	3	42.5	1086500000		Wg115;Ep22;An4;Mxg4;
Gene008643	Gasp protein	15	15	84.7	1034600000
Gene010483	BmorCPH42	11	11	41.4	995110000		Wg90;Ep15;Ov10;
Gene012517	Putative Uncharacterized protein	9	9	53.8	991180000
Gene016128	Cationic peptide CP8 precursor	3	3	41	951110000		Br175;Mp40;Tes;38;
Gene010877	BmorCPR15	5	5	24.3	935930000
Gene010574	RNA-binding protein EWS-like	5	5	21.6	803950000		Wg38,
Gene010123	BmYellow-e protein	10	10	35.6	801860000
Gene010075	Chemosensory protein	2	2	19.8	756760000
Gene015758	BmorCPCFC	7	7	58.4	738620000
Gene012510	BmorCPR87	4	2	42	710860000
Gene000093	Tubulin alpha-1 chain	16	11	44.2	706250000
Gene008014	BmorCPAP1-A	8	8	77	696210000
Gene012515	BmorCPR82	3	3	34.2	684980000		Wg17;Em2;
Gene009737	Ribosomal protein P2	6	6	61.6	683020000
Gene005255	BmorCPLCP11	40	34	77.7	667190000		Wd415;Wg40,Ep40;Ce25;
Gene014133	BmorCPR48	21	21	80.4	631620000		Wg54
Gene011506;Gene011505;Gene010445	Low molecular 30 kDa lipoprotein PBMHP-6 precursor	11	10	53.9	626310000		Br255;Mp40;Tes15;Wd5;
Gene011789	Lupus la ribonucleoprotein	5	5	28.5	581030000
Gene008646	BmorCPAP3-D1	8	8	55.3	580480000
Gene003084;Gene003083	Alpha-crystallin B chain-like	7	7	26.6	577880000
Gene010482	Ribosomal protein L40	3	3	12.5	554000000
Gene012471	BmorCPR150	4	4	39.2	529300000
Gene005817	Transposase for insertion sequence element	1	1	7.9	529290000	U
Gene015189	Apolipophorins isoform X2	191	191	61.3	515490000
Gene013404	Thymosin isoform 1	12	12	68.8	512670000
Gene005881	Acyl-CoA-binding protein homolog	5	5	48.4	505660000
Gene012875	BmorCPR78	10	10	68.9	466900000
Gene003922	BmorCPR71	4	4	28.2	450370000
Gene011496	30K protein 7	20	3	78	446620000
Gene012939	Superoxide dismutase	8	8	86.4	443800000
Gene003032;Gene008985	Elongation factor 1 alpha	26	26	60.3	427200000
Gene012647	BmorCPR37	2	2	12.5	427180000
Gene012424	27 kDa glycoprotein precursor	13	13	61.2	401650000
Gene016146	Cellular retinoic acid binding protein	5	5	44.3	401420000
Gene013257	Endochitinase A1-like	16	16	36.9	390960000
Gene011504	Low molecular 30 kDa lipoprotein PBMHPC-21	13	6	50.6	371840000
Gene011130	Chemosensory protein 4 precursor	8	8	57.4	371200000
Gene003664	Glutathione S-transferase delta 2	11	11	58.8	356660000
Gene002585	Farnesoic acid O-methyltransferase	5	5	20.5	355510000
Gene010902	Glucose dehydrogenase [FAD, quinone]-like isoform X2	18	18	29.2	354960000
Gene010947	Chymotrypsin inhibitor CI-8A	23	23	55.9	348900000
Gene013114	Proline-rich extensin-like protein EPR1	19	19	45	348830000
Gene016530	General odorant-binding protein 83a-like	8	5	61	342150000
Gene013308	Odorant binding protein	8	8	42.5	339070000
Gene005137	Cyclophilin-like protein	8	8	67.3	329780000
Gene006929	BmorCPH28	28	28	68	321350000
Gene012467	BmorCPR128	8	8	75.2	318660000		Wg17;
Gene010579	BmorCPG9	8	8	50.2	315440000		Wg40;Ce12;Ep5;Sg4;Ov3;
Gene012516	BmorCPR81	9	9	44.4	312160000
Gene000267	Chitinase-like protein EN03	21	21	63.4	310470000
Gene005267	Heat shock cognate protein	33	25	56.1	307470000
Gene015342	Vitellogenin	66	66	41	306330000
Gene002670	14-3-3 protein zeta	12	9	47	304740000
Gene016022	Antitrypsin isoform 1 precursor	14	14	33.7	294370000
Gene009847	Epsilon protein，	16	13	64.1	288390000
Gene002119	Profilin protein	8	8	79.4	285330000
Gene011810;Gene011809;Gene009218;Gene011808;Gene015291	Beta-tubulin	20	10	59.1	285060000
Gene007300;Gene012134	Ribosomal protein L40	5	1	41.1	280720000
Gene008726;Gene008725	Abnormal wing disc-like protein	9	9	74.7	278370000
Gene003746	Uncharacterized protein LOC101741477	11	11	52.1	275660000		Wg4;
Gene006479	Protein disulfide isomerase precursor	22	22	52.2	267160000
Gene011126	Chemosensory protein 5 precursor	5	5	36.8	263810000
Gene008612	Chondroitin proteoglycan-2-lik	7	7	26.9	262430000
Gene004990;Gene004995;Gene004994	Transporting ATP synthase beta subunit isoform 2	20	20	53.6	244830000
Gene008534	Heat shock protein 70-3	34	29	55.2	242160000
Gene000210	FK506-binding protein precursor	14	14	69	241520000
Gene003606	37-kDa protease precursor	10	10	34.7	236480000
Gene001498	Voltage-dependent anion-selective channel isoform X1	16	16	49.1	231130000
Gene005878	Time interval measuring enzyme-esterase A4; Cu-Zn family	6	6	47.7	225600000
Gene008648	BmorCPAP3-A1	8	8	50.5	223080000
Gene012464	BmorCPR129	5	5	49.7	218700000
Gene001108	Putative uncharacterized protein	1	1	10.6	213930000	U
Gene015743	BmorCPR136	10	10	65.4	213790000
Gene015381;Gene015380	Heat shock protein 83	34	33	47.8	210650000
Gene014180	Myb-like protein J	14	14	26.7	208060000
Gene013327	Transferrin precursor	34	34	55.9	207350000
Gene012651	BmorCPR33	3	3	28.3	206130000
Gene010402	BmorCPG3	2	2	17.9	202300000
Gene009286	Uncharacterized protein LOC101743840	10	10	46.7	201760000
Gene009244	Thiol peroxiredoxin isoform X1	11	10	61	199430000
Gene007534	Serine protease	2	2	9	198920000
Gene012469	BmorCPR126	5	5	47.9	193700000		Ep6;Wg5;An1;Mxg1;Em1;
Gene015220;Gene012387	Calreticulin	20	20	58.3	172890000
Gene000774	BmorCPAP1-F	3	3	25	172330000	U
Gene016764;Gene016763	Heat shock protein hsp20.1	14	12	79.2	171540000
Gene007442	Nonmuscle myosin essential light chain	8	8	49	167290000
Gene009890	Myosin heavy chain, non-muscle	21	21	42.8	166600000
Gene009141	Ribosomal protein P1	2	2	21.4	165990000
Gene011139	Chemosensory protein 7 precurso	6	6	45.9	164550000
Gene014462	ML-domain containing secreted protein	2	2	23.7	164460000
Gene013848	Actin-depolymerizing factor	11	11	75	159540000
Gene006270	Peroxidase-like	18	18	29.8	159080000
Gene002882	Tumor protein D54	5	5	18.3	153690000
Gene010239	Transgelin	9	9	57.4	149510000
Gene001260	GK22025	2	2	22.7	144420000
Gene011675	Salivary cysteine-rich peptide precursor	6	6	54.1	142400000
Gene006661	Cuticular protein hypothetical 21 precursor	1	1	14.8	139020000	U
Gene015052	Vacuolar ATPase B subunit	15	15	34.2	136870000
Gene001614	GLEAN_07945	2	2	12.2	135780000
Gene003030	Protein disulfide-isomerase like protein ERp57 precursor	26	26	51.3	135290000
Gene015209	Tubulin alpha chain	6	1	26.1	134950000
Gene011129	Chemosensory protein 1 precursor	4	4	34.1	133610000
Gene009702	Phenoloxidase subunit 2 precursor	26	25	38.1	132490000
Gene015486	BmorCPR133	12	12	72.3	132370000		Wg14;Ce1;Cal1;Wd1;Ov2;
Gene005354	Apolipophorin-III precursor	23	23	40.4	129070000
Gene006390	Ribosomal protein S28	3	3	44.6	126540000
Gene009457	Aldo-keto reductase AKR2E4	8	8	21.2	124780000
Gene011566	Ribosomal protein S12	6	6	58.3	123220000
Gene003472	Putative uncharacterized protein	25	25	49.4	122120000
Gene006360	Chemosensory protein 4 precursor	8	8	57.5	121170000
Gene011998	Chemosensory protein 16 precursor	3	3	25.5	119360000
Gene011652	FK506-binding protein	3	3	38.9	118280000
Gene005356	Hemocytin	21	21	30.3	118180000
Gene005819	GL13557	1	1	17.8	117620000	U
Gene009128	Protein takeout-like	6	6	20.1	116440000
Gene005978	Putative Uncharacterized protein	2	2	26.1	114420000
Gene001867	Lmmune-related protein 2 precursor	7	7	54.8	111600000
Gene009749	BmorCPR56	7	7	47.5	103900000
Gene016275	Peroxiredoxin	6	6	42.6	102030000
Gene013422	Fibroinase precursor	11	11	32.6	101680000
Gene009137	Fibrous sHeath CABYR-binding protein-like	21	21	24.6	101200000
Gene003918	BmorCPR69	3	3	26.5	100160000
Gene003953	Annexin IX isoform B	18	17	59.1	99674000
Gene001970	Very low-density lipoprotein receptor isoform 1 precursor/ chitin deacetylase 1	18	18	38.1	97733000
Gene013292	Ubiquitin-like protein SMT3	4	4	42.9	97551000
Gene001572	Glutathione S-transferase sigma 2	14	14	65.2	97249000
Gene011491	30K lipoprotein	6	2	24.2	96884000
Gene011494;Gene011495	30K protein 3	14	4	56.5	95011000
Gene004645	Perilipin-4 isoform X2	42	42	60.2	94801000
Gene013230	Hemolymph juvenile hormone binding protein	5	5	29.2	94547000
Gene005990	Uncharacterized protein LOC101745456	3	3	41.1	94267000	U
Gene009889	Myosin heavy chain, non-muscle	3	3	35.3	90660000
Gene012179	Tropomyosin isoform X9	12	12	24.7	90355000
Gene013425	Cathepsin D precursor	5	5	21.1	90326000
Gene011137	Chemosensory protein 6 precursor	6	6	43.7	90074000
Gene012650	BmorCPR34	5	5	25.1	89059000
Gene010979	ATP synthase	22	22	37.8	88820000
Gene007948	Cocoonase	8	8	32.7	88719000
Gene010473	Lndole-3-acetaldehyde oxidase-like	28	28	24.8	87551000
Gene001235	Translation initiation factor 5A	8	8	43.8	86141000
Gene007306	FK506-binding protein 4	14	14	55.7	86116000
Gene000378	Catalase	25	25	51.3	85930000
Gene007178	H+ transporting ATP synthase delta subunit	5	5	26.1	85826000
Gene011336	Translation elongation factor 2	30	30	37.6	85782000
Gene010800	Vacuolar ATP synthase catalytic subunit A	25	25	47.2	85286000
Gene004107	Putative protease inhibitor 4	2	2	20.6	85154000
Gene011094	Proteasome subunit alpha type-4	7	7	28.4	85119000
Gene010116;Gene010115	Protein yellow-like	8	8	21.3	84648000
Gene006751;Gene006750	10 kDa Heat shock protein, mitochondrial	8	8	69.9	83153000
Gene004357	BmorCPH5	4	4	43.9	81077000
Gene010171	BCP inhibitor precursor	5	5	43.8	80144000
Gene004748	Titin	19	19	43.8	79413000
Gene007050	Saposin-like protein	16	8	14.7	79002000
Gene012921	Collagen alpha-2(I) chain-like	10	10	47.1	78594000
Gene015283	heat shock protein hsp 19.9	12	7	61	78043000
Gene012642	BmorCPR41	7	7	43.9	78017000
Gene015286	Heat shock protein 20.8	10	2	49.5	76346000
Gene004762	Actin muscle-type A2	15	2	51.1	76146000
Gene001320	Uncharacterized protein LOC101743420	5	5	48.8	76019000
Gene014050	Clip domain serine protease 11 precursor	10	10	22.1	75686000
Gene003708	Unknown secreted protein	4	4	15.4	75012000
Gene011499;Gene011498	Low molecular 30 kDa lipoprotein	13	13	56.1	74351000
Gene004473	Uncharacterized protein LOC105667360	6	4	35.7	73565000
Gene009291	Pro-phenol oxidase	12	10	31.4	70579000
Gene010760;Gene003354	ATP synthase lipid-binding protein mitochondrial	1	1	5.3	70533000	U
Gene002664	Ubiquitin carboxy-terminal hydrolase	8	8	41.3	69423000
Gene009198	Ribosomal protein P0	11	11	41.1	69035000
Gene013315	Uncharacterized protein LOC101740613	4	4	36.2	67296000
Gene016817;Gene016562;Gene016561;Gene016560;Gene016558	Histone H2A	4	2	41.9	67094000
Gene013950	Lysosomal thiol reductase	10	10	47.1	64794000
Gene001932	C-type lectin 4 isoform X1	8	7	38.9	64707000
Gene009150	Uncharacterized protein LOC101746276	16	16	44.3	64577000		Wg27; Wd4;Ce3
Gene007776	Heat shock protein hsp21.4	5	5	27.8	63599000
Gene007377	Repressor splicing factor 1 isoform X1	3	3	28.1	63074000
Gene011791	Homologue of Sarcophaga 26 29kDa proteinase	9	9	17.5	62192000
Gene010153	Cathepsin B	7	7	20.5	61166000
Gene004582	Uncharacterized protein LOC778506 isoform X1	19	19	70.2	60986000
Gene001252	Receptor for activated protein kinase C RACK 1 isoform 1	14	14	56.7	60677000
Gene011412	Vacuolar ATP synthase subunit G	3	3	27.4	60591000
Gene014966	Methenyltetrahydrofolate synthase domain-containing protein	16	16	36.3	60545000
Gene011280	Transitional endoplasmic reticulum ATPase TER94	29	29	44	60295000
Gene009449	Fructose 1,6-bisphosphate aldolase	14	14	41.8	60279000
Gene010823	Promoting protein precursor	6	6	37	60100000
Gene005880	Superoxide dismutase [Cu-Zn]	4	4	15.7	59737000
Gene006962	Putative uncharacterized protein GLEAN_07699	1	1	11.4	58772000	U
Gene001495	Elongation factor 1-beta&apos	9	9	44.1	58737000
Gene010727	Arylalkylamine N-acetyltransferase	8	8	34.6	58701000
Gene015773	GK11459	16	16	13.2	58677000
Gene004616	Mobility group protein 1B	4	4	32.8	58337000
Gene014236	Mitochondrial ATP synthase coupling factor	3	3	35.8	58181000
Gene005355	Hemocytin	34	34	33	58093000
Gene016461	Basigin	6	6	26.8	58062000
Gene015589	Uncharacterized protein LOC101746322	5	5	59.6	56015000
Gene000891	Nascent polypeptide associated complex protein alpha subunit	4	4	26.8	54641000
Gene008165	Alpha-N-acetylgalactosaminidase-like	9	9	23	54410000
Gene003744	Hematological and neurological expressed 1 protein-like	5	5	61.1	54217000
Gene002332	Proteasome beta-subunit	6	6	31.4	53721000
Gene007239	Uncharacterized protein LOC100500745	3	3	33.6	53716000
Gene011143	BmorCPG35	3	3	15.2	53714000
Gene011277	Ninjurin-1	5	5	22.2	53664000
Gene011811	Ribosomal protein S20	3	3	29.3	53300000
Gene010117	Yellow-12	8	8	23.5	53006000
Gene010184	Yellow-b	9	9	22.8	52065000
Gene009759	Phosphatidylethanolamine binding protein isoform 2	5	2	23.6	51074000
Gene011944	Putative uncharacterized protein	2	2	34.5	50666000	U
Gene011023	Vesicle amine transport protein	21	21	54.2	50166000
Gene015524	Proteasome zeta subunit	6	6	26.7	49442000
Gene005756;Gene005755	Lsocitrate dehydrogenase	18	17	37.5	49382000
Gene006873	Proteasome subunit alpha type 6-A	11	11	41.5	49035000
Gene002533;Gene002532	Mitochondrial-processing peptidase subunit beta-like	14	14	31.7	48803000
Gene001176;Gene001175	60 kDa Heat shock protein, mitochondrial-like	20	20	41.8	47936000
Gene011524	Microvitellogenin-like isoform X2	9	9	29.9	47781000
Gene011731	Cytochrome c oxidase polypeptide Vb	5	5	47.5	47731000
Gene016565;Gene001013;Gene009927	Neurofilament heavy polypeptide-like	3	3	35.3	46870000	U
Gene004543	Enolase	12	12	33.5	46803000
Gene003688	Endonuclease and reverse transcriptase-like protein	1	1	6.5	46797000	U
Gene011878;Gene007672	Ribosomal protein S10	7	7	38.1	45845000
Gene001581	Sterol carrier protein x	8	8	19.2	45745000
Gene012521	BmorCPR79	7	6	23.3	45338000
Gene005276	Moesin/ezrin/radixin homolog 1	19	19	27	44930000
Gene016815;Gene016807	Histone H2B-like protein	7	7	48.4	43653000
Gene013311	Catalase-like	10	10	20.6	43411000
Gene008850	Cytosolic non-specific dipeptidase	15	15	35.7	42610000
Gene003195	Bmsqd-2	4	4	16.6	41913000
Gene014062	ADP/ATP translocase	16	16	46	41791000
Gene009948	Mesencephalic astrocyte-derived neurotrophic factor homolog	10	10	45.1	41397000
Gene011713	Prolow-density lipoprotein receptor-related protein 1-like	20	20	39	41162000
Gene008516;Gene008515	Putative uncharacterized protein (Fragment)	2	2	23	40299000
Gene009250	Ribosomal protein L35A	9	9	55.1	39757000
Gene002085	Hydroxyacyl-coenzyme A dehydrogenase	25	25	38.6	39605000
Gene010982	Ras-like GTP-binding protein Rho1 isoform X1	5	5	26	39211000
Gene005499	Cytosolic juvenile hormone binding protein 36kDa subunit	7	7	26.4	38941000
Gene002866	Adenylyl cyclase-associated protein 1 isoform X1	16	16	34.2	38598000
Gene000411	Probable medium-chain specific acyl-CoA dehydrogenase, mitochondrial isoform X1	16	16	45.9	38352000
Gene010785	Elongation factor 1 gamma	18	18	33.3	38312000
Gene001286	Glyceraldehyde-3-phosphate dehydrogenase	13	13	40.7	37370000
Gene015000	Nucleoplasmin isoform 1	2	2	9.9	37329000
Gene008028	Clathrin light chain isoform X2	7	7	28	37099000
Gene008420	Ribosomal protein S3	14	14	56	37098000
Gene002633;Gene002634	Antennal binding protein precursor	6	5	43.8	37082000
Gene013997	Ferritin	3	3	13.9	36952000
Gene010573	Proteophosphoglycan 5	6	6	15.1	36858000
Gene007735	Transaldolase	8	8	26.8	36168000
Gene011063	Peroxisomal multifunctional enzyme type 2	14	14	35.1	36012000
Gene016470	Putative uncharacterized protein	2	2	18	35919000
Gene003140	Cytochrome c oxidase subunit Va	5	5	30.5	35655000
Gene013392	Uncharacterized protein LOC101744811	4	4	29.5	35565000
Gene014365	Electron-transfer-flavoprotein beta polypeptide	9	9	42.7	35361000
Gene007135	Uncharacterized protein LOC101746257	7	7	20.4	35230000
Gene009561	Myosin light polypeptide 9 isoform 1	3	3	17.3	34953000
Gene011115	Thioredoxin domain-containing protein 2	37	37	32.9	34793000
Gene012328	Endoplasmin-like precursor	26	25	35.1	34705000
Gene006086	Multiple coagulation factor deficiency protein 2 homolog isoform X1	7	7	36.4	34653000
Gene015377	Heat shock protein 70	5	0	9.2	34518000
Gene003916	BmorCPR68	4	3	21.2	34498000
Gene006778	Small nuclear ribonucleoprotein protein F	4	4	44.3	34305000
Gene013773;Gene013772	Thioredoxin-like protein	3	3	26.4	34267000
Gene016513	Electron transfer flavoprotein subunit alpha, mitochondrial	13	13	38.8	34074000
Gene007782	Muscle LIM protein	4	4	10.9	33987000
Gene016590	BmP109	9	1	24	33839000	U
Gene003418	KGM_19465	4	4	14.6	33826000
Gene014183	T-complex protein 1 subunit eta	25	25	55	33516000
Gene011493	Low molecular 30 kDa lipoprotein PBMHP-12 OS	20	4	78.9	33490000
Gene002093	Ribosomal protein S18	8	8	48.7	33393000
Gene016820;Gene016795;Gene016568;Gene001015;Gene001014;Gene016563;Gene016567	Neurofilament heavy polypeptide-like	6	6	50.5	33157000
Gene012836	ADP-ribosylation factor-like protein	3	3	17.1	32981000
Gene016492	Uncharacterized protein LOC101742613	5	5	20.3	32876000
Gene006391	Signal sequence receptor precursor	4	4	21.1	32779000
Gene008248	Proteasome subunit alpha type-1 isoform X2	12	12	47.5	31982000
Gene011402	Proteasome beta subunit	3	3	17.7	31701000
Gene015317	Transcriptional activator protein Pur-alpha isoform X1	9	9	41.6	31666000
Gene009125	Putative	3	3	14.3	31626000
Gene007908	Yellow protein	10	10	23.5	30678000
Gene007974	Rab proteins geranylgeranyltransferase component A 2	19	19	45.1	30643000
Gene009508	BmorCPH31	7	7	40.7	30382000
Gene013296	Glutathione peroxidase	5	5	33.3	30239000
Gene011915	HnRNPA/B-like 28	5	5	25.8	29722000
Gene000390	BmorCPT2	3	2	10.4	29693000
Gene013273	Kazal-type proteinase inhibitor precursor	4	4	49	29378000
Gene011843	Putative uncharacterized protein	4	4	16.7	29178000
Gene015371	Heterotrimeric guanine nucleotide-binding protein beta subunit isoform X1	8	8	27.4	29106000
Gene002915	Uncharacterized protein LOC101744379 isoform X2	7	7	49.8	27905000
Gene007773	Chaperonin containing t-complex polypeptide 1 beta subunit	19	19	40.5	27504000
Gene001217	26S protease regulatory subunit 7	14	14	31.3	27358000
Gene015522	BmorCPLCP3	31	30	66.2	27318000		Wd298;Wg41;36Ce;Ep15
Gene016039	40S Ribosomal protein SA	5	5	15.7	26935000
Gene011814;Gene016299	Transketolase	17	17	30.9	26382000
Gene001322	Unknown secreted protein	2	2	14.8	26184000
Gene015805	28 kDa heat- and acid-stable phosphoprotein-like	3	3	23.8	26126000
Gene012995	Aminoacylase	6	2	15.8	25866000
Gene001900	Putative uncharacterized protein	2	2	2.4	25590000	U
Gene012513;Gene012504	BmorCPR84	2	1	14.1	25526000
Gene015913	Proteasome 25 kDa subunit	5	5	22.6	25420000
Gene008673	Eukaryotic translation initiation factor 3 subunit I	9	9	31.6	25293000
Gene008779;Gene001155	Ribosomal protein S26	3	3	27	25204000	U
Gene006939;Gene005651	69/Ribosomal protein S15A	8	8	62.8	25095000	U
Gene003157;Gene003156	Heat shock protein 25.4 precursor	6	6	29.6	24900000
Gene009293	Prophenoloxidase-1	23	20	35	24685000
Gene014101;Gene014102	Sui1	2	2	21.8	24591000
Gene005311	Uncharacterized protein LOC105842214	23	23	23.8	24469000
Gene008213	Nucleosome assembly protein isoform 1	11	11	36.2	24394000
Gene000326	Glutamine synthetase 2 cytoplasmic-like isoform X1	8	8	20.6	24181000
Gene000961	Chymotrypsin inhibitor SCI-III precursor	3	3	40.7	24139000
Gene001222	Fumarylacetoacetase	11	11	27.7	24133000
Gene002543	32 kDa apolipoprotein precursor	12	12	41.8	23821000
Gene003921	BmorCPR70	4	3	31.4	23574000
Gene011114	Uncharacterized protein LOC101745941	22	22	26.7	23492000
Gene011594	Ribosomal protein S7	6	6	26.8	23470000
Gene007081	Mitochondrial aldehyde dehydrogenase	11	11	24.8	23447000
Gene007130	Ribosomal protein L9	8	8	34.7	23404000
Gene001969	Uncharacterized protein LOC101740647	16	16	29.3	23342000
Gene006527	Glutathione S-transferase omega 1	6	6	24	23180000
Gene009667	Putative uncharacterized protein	1	1	5.6	23146000	U
Gene007988	Rab GDP dissociation inhibitor alpha	10	10	25.1	23102000
Gene001080	Aldo-keto reductase	6	6	16.2	22937000
Gene011110	Peptidylprolyl isomerase B precursor	10	10	60	22903000
Gene008016	DNA supercoiling factor precursor	7	7	25.5	22825000
Gene003427	AGAP012613-PA	1	1	14.3	22548000	U
Gene010664	26S protease regulatory subunit 6B	14	14	35.9	22542000
Gene007259	Chaperonin subunit 4 delta	17	17	32.8	22533000
Gene001838	Proteasome 26S non-ATPase subunit 7	6	6	23	22467000
Gene014955	Lipopolysaccharide binding protein (Precursor)	6	3	18.9	22269000
Gene006093	Gelsolin-like	12	12	34.4	22232000
Gene011937	60S Ribosomal protein L17	8	8	34.8	22230000
Gene009697	Chaperonin subunit 6a zeta	18	18	40.1	22105000
Gene014419	Peroxisome biogenesis protein 6	4	4	32.8	21833000
Gene005012	Putative defense protein 3	4	4	20.5	21787000
Gene007039	Cytosolic malate dehydrogenase	17	17	54.4	21702000
Gene012898	40S Ribosomal protein S4	12	12	39.9	21649000
Gene015809	Protein singed	17	17	46.6	21611000
Gene002930	Lamin-C-like	29	29	44.7	21604000
Gene000538	Myristoylated alanine-rich C-kinase substrate	4	4	25.2	21484000
Gene013416	Sex-specific storage-protein 1	15	15	20.6	21448000	U
Gene011993	Ribosomal protein S15	5	5	40.1	21313000
Gene011745	26S protease regulatory subunit 8	14	13	38.2	21292000
Gene005792	Nuclear transport factor 2	2	2	11.5	21272000
Gene009033	Lnter-alpha-trypsin inhibitor heavy chain H4-like isoform X1	9	9	24.3	21180000
Gene008121	Glucosamine-6-phosphate isomerase	4	4	15.1	21140000
Gene015744	Putative acetyl transferase	15	15	46.5	21068000
Gene013454	DJ-1 beta isoform X1	6	6	33.8	20899000
Gene002847	Putative serine protease-like protein 2	5	5	15.5	20876000
Gene013312	Catalase	6	6	12.9	20848000
Gene000285	Triosephosphate isomerase	8	8	34.7	20742000
Gene010623	Proteasome alpha 3 subunit	10	10	35.3	20642000
Gene009560	Glucose oxidase	7	6	11.6	20416000
Gene016520	Fibrillin-like protein	3	3	6.4	20337000
Gene006783	Tyrosine-protein phosphatase Lar	5	5	31	20182000
Gene012170	Mitochondrial aldehyde dehydrogenase	9	9	20.1	20172000
Gene005353	Hemocytin	6	6	8.9	20102000
Gene014123	Translocon-associated protein delta subunit	1	1	6.5	20021000	U
Gene016244	Serine proteinase-like protein	5	5	11.5	20003000
Gene010603	Hypothetical protein KGM_06525	3	3	10.2	19913000
Gene007196	Hsc70-interacting protein-like	8	8	24.9	19897000
Gene001159	3-hydroxyacyl-CoA dehydrogenase	11	11	29.4	19884000
Gene004708	Annexin isoform X6	10	10	28.8	19671000
Gene015484	Acheron	8	8	21.6	19640000
Gene003645;Gene003644	Ras protein	6	6	35.3	19465000
Gene003050	Ras small monomeric GTPase Rab6	6	6	29.2	19289000
Gene002098	V-type proton ATPase subunit d	3	3	8	19104000
Gene003006	Putative serine protease K12H4.7	7	7	15.5	18977000
Gene000931	Proteasome subunit beta type-4	5	5	21.4	18868000
Gene012444;Gene000933	Ribosomal protein	6	6	51.4	18827000
Gene004710	Mitochondrial matrix protein p32	5	5	23.4	18676000
Gene004878	Lnorganic pyrophosphatase	10	10	28.7	18664000
Gene016137	Nesprin-1 putative	3	3	13.5	18626000
Gene012766	SH3 domain-binding glutamic acid-rich protein homolog	9	9	38.8	18587000
Gene006437	Cytochrome c1	5	5	17.2	18535000
Gene000313	Citrate synthase	8	8	19.1	18387000
Gene002503	Protein disulfide-isomerase A6	13	13	31.1	18241000
Gene011751	Fatty acid beta-oxidation complex subunit beta	10	10	19.9	18176000
Gene000306	Failed axon connections isoform X2	13	13	40.9	18065000
Gene009556	Metalloendopeptidase	4	4	11.7	17948000
Gene015627	AGAP005312-PA	2	2	22.5	17846000
Gene009937	Probable enoyl-CoA hydratase, mitochondrial	12	12	41.9	17700000
Gene000890	T-complex protein 1 subunit epsilon	21	21	42.1	17674000
Gene012545	Dihydrolipoyl dehydrogenase	9	9	17.9	17576000
Gene008880	Ribosomal protein L8	9	9	30.4	17550000
Gene013287	Putative uncharacterized protein	3	3	13.6	17530000
Gene014830;Gene014829	Transcription factor BTF3 homolog 4	5	5	23	17512000
Gene010752;Gene010751	Mitochondrial prohibitin complex protein 2	12	12	40.1	17431000
Gene008645	Probable chitinase 3	7	7	21	17416000	U
Gene011276;Gene011275	Dihydropteridine reductase	7	7	26.1	17383000
Gene011341	Zinc finger protein isoform X1	5	5	37.8	17359000
Gene016722	NSFL1 cofactor p47	6	6	21.3	17194000
Gene003668	Ras-related GTP-binding protein Rab11	9	9	38	17149000
Gene002943	Ubiquinol-cytochrome C reductase complex 14kD subunit	3	3	21.4	17080000
Gene005466	Laccase 2 precursor	18	17	25.5	17059000
Gene006586	TPPP family protein CG4893	3	3	13.7	17055000
Gene002758	Ribosomal protein L13	9	9	34.5	16673000
Gene003915	Cuticular protein RR-2 motif 67 precursor	2	2	14.6	16605000	U
Gene012005	Ribosomal protein S6	7	7	25.7	16602000
Gene011582	A disintegrin and metalloproteinase with thrombospondin motifs like	10	10	14.3	16577000
Gene003343	Malate dehydrogenase isoform X1	12	12	20.6	16533000
Gene003897	AGAP010159-PA	2	2	12.2	16490000
Gene009112	40S Ribosomal protein S8	5	5	29.3	16471000
Gene001036	Aldo-keto reductase	2	2	10	16435000
Gene010292	Putative Uncharacterized protein	12	12	19.5	16273000
Gene005248	BmAcer protein	12	12	17.8	16113000
Gene014059	Heat shock 70 kDa protein cognate 5-like	19	18	26.4	16111000
Gene009790	Phosphoglycerate mutase	4	4	16.9	16040000
Gene016155	Very long-chain specific acyl-CoA dehydrogenase, mitochondrial	18	18	30.1	15952000
Gene002118	Eukaryotic translation initiation factor 4A	17	16	41.7	15850000
Gene009565	Phosphatidylinositol transfer protein alpha isoform	8	8	29.4	15838000
Gene010271	Ras-related protein Rac1	7	6	38.9	15805000	U
Gene002580	Putative uncharacterized protein	2	2	29.8	15796000
Gene003519	Similar to CG10527	5	5	34.8	15717000	U
Gene014429	26S protease regulatory subunit 4	12	12	25.4	15618000
Gene002232	Proteasome beta-subunit	7	7	30.5	15588000
Gene001874	Lectin 4 C-type lectin	2	2	14.9	15434000
Gene012542	Yellow-c	6	6	14.7	15426000
Gene015463	Vacuolar ATPase subunit C	11	11	27.5	15389000
Gene010288	Putative Uncharacterized protein	28	28	18.9	15364000
Gene004102	Actin-interacting protein 1	16	16	31.9	15309000
Gene005377	Plasminogen activator inhibitor 1 RNA-binding protein-like	11	11	26.7	15260000
Gene007533	Trypsin-1	2	2	9.5	15250000
Gene005406	Carboxypeptidase	4	4	16.7	15229000
Gene005744	Endoplasmic reticulum resident protein 44	10	10	21.5	15206000
Gene000812	Putative uncharacterized protein	3	3	6.7	15175000
Gene004015	Putative uncharacterized protein	1	1	2.9	15022000	U
Gene012163	T-complex protein 1 subunit gamma	19	19	35.6	14987000
Gene013129	Chaperonin	20	20	41.1	14919000
Gene002192	Proteasome subunit beta 7	7	7	26.1	14865000
Gene006943	Hsp90-organizing protein HOP	13	13	25.7	14857000
Gene010493	26S proteasome non-ATPase regulatory subunit 1	8	8	23.9	14807000
Gene005486	Putative uncharacterized protein	2	2	4.2	14753000
Gene014821	Peripheral-type benzodiazepine receptor	2	2	8.9	14750000
Gene010641	Proteasome subunit beta type	3	3	9.8	14701000
Gene005206	Pyruvate kinase	10	10	26.2	14657000
Gene003627	T-complex protein 1 subunit alpha	16	16	30.8	14315000
Gene016391	Uncharacterized protein LOC101736214	6	6	21	14297000
Gene005393	Thioredoxin-like protein	2	2	13.5	14015000
Gene003198	Secreted protein acidic and rich in cysteine	7	7	27.8	14014000
Gene011827	Protein 4.1 homolog	46	46	28.4	13980000
Gene010293	Ribosomal protein L22	4	4	38.1	13836000
Gene014645	Maltase 1	7	7	12.9	13831000
Gene009340	Ribosomal protein L6 isoform X1	10	10	29.3	13036000
Gene016029	Putative uncharacterized protein	3	3	18.9	12989000
Gene004138	ATP synthase	7	7	24.7	12916000
Gene014903	Small nuclear ribonucleoprotein sm d2	5	5	37.8	12908000	U
Gene000632	Neuronal pentraxin-2 OS=Mus musculus	17	17	35.2	12804000
Gene005987	Putative uncharacterized protein	4	4	12.2	12728000
Gene011588	Transcription elongation factor B polypeptide 1	3	3	23.1	12679000	U
Gene006092	Gelsolin-like	9	9	33.6	12673000
Gene012975	Ribosomal protein L26	7	7	40.5	12535000
Gene014275	26S protease regulatory subunit 6A	13	12	33.6	12483000
Gene010276	Putative Uncharacterized protein	7	7	17.5	12389000
Gene001385	26S proteasome non-ATPase regulatory subunit 14	6	6	20.9	12355000
Gene000885	Protein CDV3 homolog	6	6	31.3	12317000
Gene003382	Prefoldin subunit 5	5	5	33.3	12315000
Gene009369	Malate dehydrogenase, mitochondrial	7	7	21.1	12300000
Gene016711;Gene013783;Gene010039	Ribosomal protein L29	1	1	13.7	12214000	U
Gene002850	Cuticlin-1 OS=Caenorhabditis elegans GN	13	12	23.2	12161000
Gene002770	Elongation factor 1 delta	8	8	32.8	12139000
Gene005675	Kinesin heavy chain	37	37	39.8	12011000
Gene012359	Limpet isoform D	8	8	16.7	11948000
Gene006918;Gene002124;Gene002123	Ribosomal protein L36A	4	4	29.8	11926000
Gene005647;Gene005646	Nuclear excision repair protein Rad23	4	4	18.8	11870000
Gene012808	BmorCPR148(RR-3)	3	3	8	11710000	U
Gene001835	Prohibitin protein WPH	8	8	33.6	11638000
Gene014083	AGAP004055-PA	4	4	9.9	11600000
Gene007775	Synaptobrevin-1-like	3	3	27.5	11563000
Gene001512	Centromere-associated protein E	14	14	26.4	11559000
Gene012417	Calcyphosin-like protein	6	6	26.7	11556000
Gene009949	Putative ATP synthase subunit f, mitochondrial	3	3	34.6	11371000
Gene002523	ATPase inhibitor-like protein	6	6	10.9	11317000
Gene011485;Gene011484	Low molecular mass 30 kDa lipoprotein 21G1-like precursor	8	8	36.6	11267000
Gene009690	Putative uncharacterized protein	8	8	15	11149000
Gene000773	Similar to CG13676-PA	12	12	11.4	11084000
Gene013475	26S proteasome non-ATPase regulatory subunit 13	14	14	40.3	10964000
Gene000291;Gene000290	Uncharacterized protein LOC101735522	14	14	30.5	10910000
Gene012994	Aminoacylase	5	1	25	10872000	U
Gene013173	K09228 KRAB domain-containing zinc finger protein	11	11	27.3	10794000
Gene008640	Thioredoxin	4	4	18.1	10786000
Gene009233	Carboxypeptidase inhibitor	1	1	14.2	10786000	U
Gene001119	Putative Uncharacterized protein	15	15	11.5	10786000
Gene005022	Glucosinolate sulphatase	4	4	10.9	10738000
Gene013309	Uncharacterized protein LOC101740473	3	3	22.6	10710000
Gene003873	Serine protease inhibitor serpin	9	9	17.9	10656000
Gene013131	C-Myc-binding protein	4	4	51.7	10628000
Gene009602	Apyrase	7	7	12.4	10611000
Gene005192	Putative peroxiredoxin	5	3	19	10575000
Gene010120	Yellow-d	6	6	14.1	10548000
Gene004664	Probable dynactin subunit 2	9	9	28.8	10544000
Gene010529	AGAP004742	15	15	15.2	10508000
Gene005652	AGAP000295-PA	2	2	21.8	10499000	U
Gene007734	Heat shock 70 kDa protein 4L	14	14	19.5	10482000
Gene013683	Low molecular mass 30 kDa lipoprotein 19G1-like	13	6	31.2	10471000
Gene006742	Mitochondrial thioredoxin 2	2	2	11.4	10389000	U
Gene005608	Titin	6	6	24.2	10367000
Gene009514	Ubiquitin-conjugating enzyme	1	1	5.8	10302000	U
Gene001417	AGAP010429	11	11	17.3	10288000
Gene010494	26S proteasome non-ATPase regulatory subunit 1	14	14	30.2	10233000
Gene010460	Kinesin light chain isoform X4	13	13	30.1	10146000
Gene002881	AGAP004758-PA	5	5	15.7	10033000	U
Gene014433	Ribosomal protein S29	3	3	48.2	10019000
Gene015731	Protein bicaudal D	3	3	27.3	10016000
Gene008537	Spectrin alpha chain isoform X5	69	69	31.7	9987900
Gene007415	Chitooligosaccharidolytic beta-N-acetylglucosaminidase	6	6	10.7	9974300
Gene008751	Chondroitin proteoglycan-2	2	2	5.7	9964900	U
Gene002495	Putative uncharacterized protein	2	2	14.1	9959800
Gene011031	Alpha-amylase 2-like	9	9	21.8	9957600
Gene013604	40S ribosomal protein S3a	13	13	47.1	9928400
Gene016677;Gene002418	Ubiquitin-like modifier-activating enzyme 5	3	3	8.1	9761800
Gene001983	Carnitine O-acetyltransferase-like	17	17	26.8	9555200
Gene014659	Putative Uncharacterized protein	30	30	16.9	9515400
Gene009280	AGAP012380	2	2	13.1	9478700
Gene008931	Glycerophosphoryl diester phosphodiesterase	2	2	5.9	9407000
Gene015625	Charged multivesicular body protein 4b	5	5	25.7	9365400
Gene003544	Protease inhibitor 3	2	2	18.5	9308300
Gene005019	Glucosinolate sulphatase	3	3	5	9092200
Gene016587	Cystathionine beta-synthase	5	5	11.8	9018500
Gene012541	3-hydroxyacyl-coa dehyrogenase	6	6	18.3	8973500
Gene001728	Small GTP binding protein RAB5	4	4	21.6	8939800	U
Gene006639	Ubiquinol-cytochrome c reductase core protein II	5	5	12.4	8871400
Gene003351	Ribosomal protein L15	6	6	39.3	8765400
Gene014827	26S proteasome regulatory ATPase subunit 10B	9	9	23.5	8734000
Gene014148	H+ transporting ATP synthase subunite	2	2	21.2	8693100
Gene001700	Putative uncharacterized protein	4	4	8	8667200
Gene004690	Brain chitinase and chia	2	2	11.4	8581100	U
Gene003632	Heterogeneous nuclear ribonucleoprotein Q-like	11	11	36.6	8479100
Gene011904	Coatomer protein complex subunit epsilon	6	6	23.2	8459800
Gene002047	26S proteasome non-ATPase regulatory subunit putative	11	11	28.5	8446000
Gene015475	Uncharacterized protein LOC101744771	14	14	29.5	8398100
Gene005270	Vacuolar ATPase subunit a	8	6	10.1	8348700
Gene012196	Proteasome subunit beta type	3	3	9.3	8333600
Gene014598	GI23155	4	4	13	8328700
Gene004724	Ubiquitin-like modifier-activating enzyme 1	21	21	21.8	8236400
Gene003855	Paralytic peptide binding protein 1	14	5	34.6	8163400
Gene011176	Pleckstrin homology domain-containing family F member 2 isoform X1	8	8	31	8160800
Gene009079	Stromal cell-derived factor 2	4	4	15.6	8119700
Gene003712;Gene003711	Small glutamine-rich tetratricopeptide repeat-containing protein alpha-like	6	6	25.3	8065000
Gene014055	Putative uncharacterized protein	4	4	9.5	8047800
Gene011458	Putative Uncharacterized protein	21	21	15.9	8021900
Gene006565	Putative uncharacterized protein	3	3	18.1	8021200	U
Gene014654	Cysteine proteinase inhibitor	16	16	9	7962100
Gene010861	26S proteasome non-ATPase regulatory subunit 8	6	6	22.4	7934000
Gene008954	NADPH-specific isocitrate dehydrogenase	11	10	29.9	7901400
Gene008290	Juvenile hormone epoxide hydrolase-like protein 2	2	2	4.5	7898300
Gene005197	GTP-binding protein SAR1b	6	6	38.9	7773000	U
Gene015841	Ubiquitin carboxyl-terminal hydrolase	7	7	15.5	7754000
Gene004246	Yellow-b	7	7	15.7	7711900
Gene004420	LDLR chaperone boca	7	7	43.5	7688100
Gene003967	Hemocyte protease-1	5	5	12.9	7682200
Gene013746	Putative uncharacterized protein	2	2	5.2	7465700	U
Gene011542	FK506-binding protein	2	2	18.5	7457200
Gene008477	ABC transporter, ATP-binding protein	9	9	42.7	7326800
Gene007833	Hypothetical protein KGM_11922	9	9	10.3	7283100
Gene015739	Uncharacterized protein OBRU01_24190, partial	5	5	23.8	7243100
Gene003051	Atlastin-2	11	11	15.7	7202400
Gene016284	Adenosylhomocysteinase	7	7	17.4	7151000
Gene002267	Aspartate aminotransferase	9	9	28.3	7065800
Gene011607	Putative uncharacterized protein	5	5	11.7	7064200
Gene001980	GI17860	1	1	9.2	7054800	U
Gene002721	Septin	8	8	18.7	7052500
Gene009918	Trehalase	6	6	10	6984200
Gene000375	Y-box protein	4	4	22.4	6909900
Gene002859	Glucosidase	4	4	9.4	6904700
Gene007420	GE25970	2	2	8.7	6899900
Gene013665	GLEAN_14942	5	5	13.1	6865700
Gene007002	Lysozyme; 1,4-beta-N-acetylmuramidase;	7	7	51.8	6832100
Gene005989	GJ17640	7	7	8.6	6812400
Gene002252	Putative Uncharacterized protein	2	2	21.7	6811600
Gene002506;Gene002505	Dolichyl-diphosphooligosaccharide--protein glycosyltransferase subunit 1	14	14	33	6684400
Gene003103	Arginine kinase isoform 2	12	12	35.5	6676700
Gene012569	Putative uncharacterized protein	3	3	5.9	6594100
Gene015466	H+ transporting ATP synthase gamma subunit	8	8	27.4	6530500
Gene003686	Pyruvate dehydrogenase	3	3	7.6	6526100
Gene009334;Gene003974	Succinyl-CoA ligase [ADP/GDP-forming]	8	8	23.3	6519500
Gene004548	26S proteasome non-ATPase regulatory subunit 2	16	16	21	6508700
Gene004704	Acyl carrier protein	1	1	5.9	6499900	U
Gene003784	BmorCPAP1	10	10	12.7	6484600
Gene003482	SJCHGC01925 protein	9	9	18.9	6482700
Gene005169	Proliferation-associated protein 2G4	12	12	32.5	6478000
Gene015359	Small nuclear ribonucleoprotein G	1	1	11.8	6434700	U
Gene006941	Cameo1	9	9	17.6	6400000
Gene008018	Ribosomal protein L21	3	3	17	6380800
Gene012755	Dipeptidyl peptidase iii	11	11	14.9	6368700
Gene003850	GJ11692	2	2	20.9	6368400	U
Gene010074	Ommochrome-binding protein	3	3	16.8	6286600
Gene014369	Protein transport protein sec13 putative	5	5	14.1	6222200
Gene002317	Ubiquinol-cytochrome c reductase iron-sulfur subunit	3	3	12.2	6222200
Gene004974	DnaJ homolog subfamily A member 1	8	8	19.7	6203900
Gene015152	Thioredoxin peroxidase	4	3	19.4	6194200
Gene003135	Neuroglian	2	2	17.4	6191100
Gene006625	EN protein binding/engrailed nuclear homeoprotein-regulated protein	5	5	12.5	6185900
Gene003373	Probable prefoldin subunit 6	5	5	40	6170600
Gene011316	Eukaryotic translation initiation factor 3	8	8	31.1	6161300
Gene002559	Prolyl endopeptidase	4	4	24.3	6161200
Gene003447	Glutamate dehydrogenase	16	16	30.1	6149400
Gene011335	Cytidylate kinase	3	3	16.3	6111300	U
Gene008157	L(B002)	5	5	11.8	6109000
Gene016645	ATP-citrate synthase-like, partial	3	3	21.3	6089400
Gene014260;Gene004038	Putative uncharacterized protein	3	3	17.1	6000800
Gene003576	Chaoptin	1	1	0.6	5998200	U
Gene015591	Putative fatbody protein 3Rev-G1	1	1	11.9	5990400	U
Gene003338	Scolexin	2	2	9.9	5971300
Gene016310	Splicing factor proline- and glutamine-rich	5	5	30.5	5951900	U
Gene006442	60S Ribosomal protein L18	8	8	33.3	5950300
Gene013715	Lnsulin-related peptide binding protein	2	2	9.8	5910100
Gene001081	Aldo-keto reductase	3	3	10	5894600
Gene012053	Tyrosine--tRNA ligase, cytoplasmi	15	15	29.2	5889500
Gene016493	Neuroglian	8	8	11.1	5806300
Gene002040	Ribosomal protein L3	9	9	22	5729300	U
Gene008791	Uncharacterized protein LOC101740597	27	27	46.7	5706000
Gene005924	Glutathione reductase family member	7	7	16.1	5705800
Gene009523	Transmembrane emp24 domain-containing protein 2	7	7	31.9	5656300
Gene014946	GE20109	6	6	11.5	5611400
Gene014685	Small GTP-binding protein	7	6	30.2	5600800	U
Gene006034	Lysosomal alpha-mannosidase	3	3	6.9	5555100
Gene003963	Ataxin-2 homolog isoform X1	11	11	24.6	5541900
Gene013638	House keepingprotein putative	4	4	11.3	5474200
Gene016236	Putative uncharacterized protein	2	2	8	5450300	U
Gene013132	H+ transporting ATP synthase O subunit isoform 1	5	5	21.1	5399600
Gene001602	Scavenger receptor cysteine-rich protein	3	3	14.9	5395500	U
Gene000381	Putative Uncharacterized protein	11	11	18.3	5349800
Gene004662	Ribosomal protein L27	3	3	29.9	5328800	U
Gene006709	Ribosomal protein L14	6	6	33.3	5278700
Gene000577	DNA-damage inducible protein	4	4	12.5	5273900
Gene009877	Putative Uncharacterized protein	6	6	11.5	5261600
Gene001966	Lntegrator complex subunit 2	2	2	1.2	5193300
Gene001963	Transport protein Sec61 beta protein	2	2	24.7	5172500
Gene013747	GK25337	2	2	11.4	5157300	U
Gene013684	30K protein 19	12	7	29	5151400
Gene010991	CG5756 isoform B	8	8	5.8	5136500
Gene012610	Nuclear migration protein nudC	7	7	21.8	5112200
Gene006213	Spermine oxidase	1	1	3.7	5084400	U
Gene013832	Ribonucleoprotein (Fragment)	6	6	9.5	5039500
Gene015611	Ribosomal protein S11 isoform 2	10	10	53.9	5024200	U
Gene000359	Lsoform E	1	1	8	5002700	U
Gene007591	Ribosomal protein S2	8	8	32.2	5001300
Gene005595	Eukaryotic translation initiation factor 1A	1	1	7.6	4994300	U
Gene016564	Histone H1-like isoform X2	10	10	46.1	4967800
Gene004854	Myc box-dependent-interacting protein 1-like isoform 3	4	4	10.5	4952000
Gene003331	Carboxylesterase	7	7	10.3	4898700
Gene002729	Gamma-interferon-inducible lysosomal thiol reductase-like	4	4	21.2	4893500
Gene012495;Gene012494;Gene012493	BmorCPR103/102	1	1	6.8	4860400	U
Gene004945	Signal recognition particle 19 kDa protein	3	3	30.4	4860000
Gene010087	NADH dehydrogenase [ubiquinone] 1 beta subcomplex subunit 10	4	4	30.2	4820400
Gene008602	Ribosomal protein L7A	8	8	28.7	4787700	U
Gene013345	Acyl-coenzyme A dehydrogenase	4	4	10.4	4786600
Gene002737	Juvenile hormone binding protein	3	3	11.6	4719500
Gene016295	Coactosin-like protein isoform X1	6	6	21.4	4678100
Gene000503	Tudor staphylococcus/micrococcal nuclease	24	24	29.6	4668800
Gene011152	Microtubule-associated protein RP/EB family member 3	7	7	30	4645700	U
Gene015997	Eukaryotic translation termination factor 1	5	5	19.8	4638800
Gene016689	Ribosomal protein L32	5	5	32.8	4625000
Gene016271	ATP-citrate synthase-like, partial	7	7	21.7	4616800
Gene002002	Actin-related protein 2/3 complex subunit 5	1	1	10.7	4593400	U
Gene012411	Putative uncharacterized protein	2	2	6.5	4561000
Gene004832	Putative uncharacterized protein	2	2	5.3	4544800
Gene003369	Putative Uncharacterized protein	5	5	16.1	4532400	U
Gene010758	Putative uncharacterized protein GLEAN_07793	19	19	19.6	4495100
Gene007547	Putative uncharacterized protein	9	9	9.7	4477900
Gene016644	ATP-citrate synthase-like, partial	7	7	21.3	4460700
Gene012351	Eukaryotic initiation factor 4E-1	1	1	5.2	4459300	U
Gene008211	Stromal interaction molecule 1	5	5	8.8	4378700	U
Gene001358	Putative uncharacterized protein	4	4	18.4	4349300	U
Gene004738	Ral	3	3	13.2	4337700
Gene010647	Probable methylmalonate-semialdehyde dehydrogenase	5	5	11.1	4332500
Gene006950	Muscle-specific protein 300	17	17	1.7	4331400
Gene014609	GG17307	1	1	6.8	4321200	U
Gene002084	Dopa-decarboxylase	6	6	12	4312800
Gene008433	Septin-2	7	7	17.4	4311900
Gene006477	TOM1-like protein 2	8	8	22.4	4309500
Gene004621	Putative uncharacterized protein	1	1	6.3	4306000	U
Gene012264	Lsocitrate dehydrogenase	5	5	11.6	4299500
Gene009900	GLEAN_15481	11	11	13.5	4233000
Gene008037	Putative uncharacterized protein GLEAN_07397	7	7	13.4	4230000
Gene001468	Molting fluid carboxypeptidase A	7	7	15.4	4177400
Gene000175	Ribosomal protein L36	3	3	19.3	4174100	U
Gene002727;Gene002726	Ras-related protein 2	2	2	8.9	4164600
Gene001494	Putative Uncharacterized protein nuoG	9	9	13.4	4149800
Gene001974	Alanyl-tRNA synthetase cytoplasmic	15	15	15.3	4113000
Gene003134	Neuroglian	6	6	20.9	4111100
Gene009443	Bleomycin hydrolase	8	8	24	4072000
Gene015714	RE45222p	5	5	16.5	4068100
Gene003081	33.6 kDa small heat shock protein	2	2	7.7	4057600	U
Gene013998;Gene002149	Ferritin isoform 1	3	3	12.2	3984000
Gene001096	3-dehydroecdysone 3beta-reductase	3	3	7	3957200
Gene000873	Putative uncharacterized protein	2	2	16.5	3901800
Gene016094	PiggyBac transposable element-derived protein 4 (Fragment)	1	1	4.9	3894300	U
Gene008851	Serpin-6	4	4	9	3866400	U
Gene002511	Putative Uncharacterized protein	8	7	13.6	3846700	U
Gene003018	GA18577	2	2	10.5	3831600	U
Gene006961	Ceramidase	4	4	10	3828200
Gene014146	Putative uncharacterized protein	3	3	10	3818000
Gene001446	AGAP007975-PA	4	4	12	3815000
Gene016389	Hydroxypyruvate isomerase	5	5	20.8	3800800
Gene015751	Similar to F-actin-capping protein subunit alpha	3	3	14.2	3693000
Gene002759	Poly A binding protein	16	16	29.1	3690100
Gene005748	GTP binding protein	8	8	21.9	3663400
Gene004105	Chitinase	8	8	15.9	3639200
Gene011261;Gene011269	Hexosaminidase	1	1	1.5	3631300	U
Gene009147	Proteasome subunit beta type-6	5	5	24	3600800	U
Gene013217	Ribosomal protein L18A	9	9	44.1	3598700	U
Gene006996	Putative uncharacterized protein	6	6	21.5	3591200	U
Gene005158	CDGSH iron-sulfur domain-containing protein 2 homolog	4	4	35.6	3589100
Gene008834	Putative uncharacterized protein	5	5	20.9	3587400
Gene016521	Uncharacterized protein LOC101744161	6	6	20	3583600	U
Gene009089	Putative uncharacterized protein	2	2	9.2	3545900
Gene002568	Glycogenin	4	4	6.2	3538600
Gene010706	TRAS3 protein	1	1	1.8	3536600	U
Gene010918	Ribosomal protein S9	11	11	44.8	3532500
Gene013001	Yellow-12	5	5	23.5	3505500	U
Gene003769	Soluble NSF attachment protein putative	7	7	26.7	3469700
Gene000719	Phenylalanine hydroxylase	3	3	7.5	3463000
Gene014857	Retinol dehydrogenase 14	15	15	42.6	3446600	U
Gene006931	BmorCPR54	5	5	15.2	3433000
Gene015281	Plastin-2	16	16	28.9	3405800
Gene014688	GJ23421	1	1	2.1	3392300	U
Gene015250	Dihydropyrimidinase isoform X1	8	8	24.8	3391300
Gene006615	Histone deacetylase 2C putative	1	1	5	3350600	U
Gene000526	Hypothetical protein KGM_14041	4	3	22.5	3348900
Gene006254	UDP-N-acetylglucosamine pyrophosphorylase	7	7	14	3321900
Gene009629	Clathrin heavy chain	32	32	20.3	3309400
Gene004562	Putative uncharacterized protein	8	8	12.5	3275200
Gene016170	GK14239	4	4	10.3	3274300
Gene004487	AP-2 complex subunit alpha	3	3	2.5	3266700	U
Gene003748;Gene003749	Putative uncharacterized protein	2	2	3.1	3251900
Gene008828	Serpin-2	1	1	3.8	3241300	U
Gene005480	Elongation factor Tu, mitochondrial	12	12	30.1	3221600
Gene012470	BmorCPR125	15	15	43.6	3203700
Gene003713	EH domain-containing protein 3 isoform X2	16	16	35.5	3191400	U
Gene003203	Programmed cell death 6-interacting protein	18	18	22.5	3181900
Gene009553	Septin	1	1	5.6	3173300	U
Gene007561	Progesterone membrane binding protein	1	1	3.6	3163100	U
Gene010283	Hydroxysteroid dehydrogenase	7	7	16.7	3134200
Gene003927	Ribosomal protein S27	4	4	54.8	3110900	U
Gene008369	BmorCPH41	32	29	16.5	3104700
Gene011292	Putative uncharacterized protein	5	5	12.8	3104500
Gene008463	Cytochrome B5	4	4	34.3	3103800	U
Gene012731	2-oxoglutarate dehydrogenase	4	4	20.6	3102300
Gene012772	1110059p08rik-like protein	3	3	9.3	3080300
Gene000536	Putative uncharacterized protein	7	7	9.8	3060500	U
Gene006181	Ribosomal protein L4 isoform X1	18	18	36.9	3045900
Gene001540	Glyoxylate reductase/hydroxypyruvate reductase	3	3	9.3	3036200
Gene008495	Os10g0554001 protein	2	2	9.5	3022300	U
Gene014657	Lacunin	3	3	11.4	3021200
Gene003940	HSP90 cochaperone CDC37 homologue	5	5	14.2	2972100	U
Gene003698	Attacin	3	3	17.3	2970300	U
Gene016231	Eukaryotic translation initiation factor 3 subunit F	3	3	11.6	2946000
Gene014552	Flavin-dependent monooxygenase FMO1A	2	2	3.7	2917300
Gene012574	AGAP006096-PA	3	3	4.8	2903400	U
Gene012056	BmorCPR20	6	6	8.3	2872700
Gene009207	Glypican	2	2	3	2806200	U
Gene014434	GJ22743	4	4	13.2	2802900	U
Gene002128	Lysyl-tRNA synthetase	3	3	6.4	2802700
Gene007181	Phosphorylase	5	5	5.9	2781300
Gene007904	NADPH cytochrome b5 reductase 1	1	1	2.9	2780700	U
Gene006187	Aminopeptidase P-like protein	5	5	6.5	2768500
Gene013407	Luciferin regenerating enzyme	1	1	4.6	2747700	U
Gene016469	Putative uncharacterized protein	1	1	6.3	2745400	U
Gene014325	Bombyrin (Precursor)	1	1	6	2731800	U
Gene001779	Low molecular mass 30 kDa lipoprotein 21G1 OS	4	4	12.1	2717100
Gene005810	Annexin B13b	8	7	23.7	2714600
Gene002462	GJ20114	10	10	18.2	2698000	U
Gene003263	Putative uncharacterized protein	2	2	16.8	2697800	U
Gene014720	Transmembrane trafficking protein	4	4	18	2689700	U
Gene013079	Acetoacetyl-CoA thiolase isoform X1	12	12	33.3	2664400
Gene004227	Putative uncharacterized protein	6	6	9.9	2652800
Gene011564	Ribosomal protein L7	6	6	22.7	2642400	U
Gene003442	K01487 guanine deaminase	19	19	39.1	2640300
Gene014142	Pancreatic lipase-related protein 2-like	7	7	25.6	2638800	U
Gene004999;Gene004998	Signal peptidase 18 kDa subunit	3	3	14	2631400	U
Gene000645	Hypothetical protein KGM_08730	4	4	11	2623300
Gene009437	Putative uncharacterized protein	10	10	7.6	2613200
Gene006643	AGAP006670-PA	2	2	5.6	2611100	U
Gene011457	Bullous pemphigoid antigen 1 isoforms 6/9/10	7	7	5.5	2605500
Gene000644	Basement membrane-specific heparan sulfate proteoglycan core protein (Fragment)	12	12	17.7	2596800
Gene014537	Prophenoloxidase activating factor 3	3	3	8.4	2583800
Gene009905	HEAT repeat-containing protein 2	3	3	17.2	2579900	U
Gene008345	Putative uncharacterized protein	4	4	7.9	2563600	U
Gene012350	MRNA cap-binding protein eIF4E	6	6	31.4	2535000
Gene003772	Putative Uncharacterized protein DKFZp459H142	9	9	20.5	2527000
Gene011232	Mitochondrial NADH:ubiquinone oxidoreductase NDUFS4/18 kDa subunit	2	2	11.6	2513500
Gene009762	Acid phosphatase-1	2	2	5	2501200
Gene000479	AGAP007494-PA	2	2	5.4	2479500
Gene014814	Putative uncharacterized protein	2	2	6.4	2468100	U
Gene002058	Probable 26S proteasome non-ATPase regulatory subunit 3	10	10	23.5	2451200
Gene004798	Putative uncharacterized protein	2	2	8.4	2449200
Gene004747	Putative uncharacterized protein	1	1	0.9	2413400	U
Gene005803	Putative alcohol dehydrogenase	2	2	8.9	2404600	U
Gene015399	Plasma membrane calcium ATPase isoform K	11	11	13	2393700
Gene006315	Alanine aminotransferase	10	10	19.8	2388100
Gene003077	Tripeptidyl-peptidase 2	15	15	13	2365900
Gene015532	Putative uncharacterized protein	12	12	4.5	2359800
Gene008544	Glycyl-tRNA synthetase	4	4	5.2	2340900
Gene012600	BmorCPR146(RR-3)	1	1	0.9	2308600	U
Gene002285	Signal peptidase complex subunit 2	6	6	26.6	2294300
Gene011197	G protein alpha subunit Go isoform 1	8	8	23.4	2289300
Gene003934	Chitinase (Precursor)	3	3	6.2	2284000
Gene006567	Aminopeptidase N putative	12	12	12.4	2278000
Gene001356	Ribosomal protein L13A	10	10	40.7	2274000
Gene010835	Fumarate hydratase, mitochondrial-like	10	10	21.1	2271600
Gene014803	Putative uncharacterized protein	2	2	3.6	2218800	U
Gene002798	GK20329	2	2	3.4	2170200	U
Gene009043	C-type lectin	3	2	17.9	2145700	U
Gene000528	1-Cys peroxiredoxin	1	1	5.4	2136200	U
Gene013830	Coatomer protein complex subunit delta	8	8	14.8	2132400	U
Gene015307	Hypothetical protein KGM_15052	2	2	12.5	2125900
Gene010771	Putative uncharacterized protein	4	4	7.1	2122600
Gene015271	CBR-LEA-1 protein	3	3	9.8	2098800
Gene001934	DnaJ-1	5	5	14.2	2077500
Gene013959	GrpE protein homolog	2	2	9.1	2034300	U
Gene009315	Vitellogenic carboxypeptidase	2	2	3.2	2033100
Gene000337	EVI5-like protein	8	8	10	2024800
Gene005524	Multi-binding protein	2	2	9.9	2020000
Gene010786	Calcineurin B	1	1	5.9	2019600	U
Gene014954	Lipopolysaccharide binding protein	4	1	11.2	2018800
Gene015149	Fumarylacetoacetate hydrolase isoform A	2	2	6.1	2011900	U
Gene012379	Transport protein Sec61 alpha subunit	4	4	7.8	2011500
Gene004643	Ubiquitin carboxyl-terminal hydrolase	5	5	7	2009300
Gene009531	NIPSNAP protein	1	1	4.4	2005300	U
Gene009951	Proteasome 26S non-ATPase subunit 4	6	6	21.8	1999800
Gene009568	Macrophage migration inhibitory factor	2	2	12.6	1997000
Gene004569	Lissencephaly-1 homolog	2	2	7.1	1987100	U
Gene009489	Vanin-like protein 1	3	3	6.8	1970700
Gene014536	Putative uncharacterized protein	1	1	7	1968400	U
Gene010673;Gene010672	BmorCPR10	7	7	33.8	1935500	U
Gene011461	Plectin-1	4	4	5.8	1931000
Gene001087	GK17563	2	2	7.7	1914000
Gene001393	Ribosomal protein L11	5	5	23.6	1883300	U
Gene011521	BmLSP-T	2	2	9.4	1878500
Gene002556	Putative uncharacterized protein	4	4	9.6	1873300
Gene002420	Hsp40	4	4	12.3	1821800
Gene012840	Signal recognition particle subunit srp72	6	6	10.4	1801500
Gene006489	Beta-N-acetylglucosaminidase 1 precursor	12	12	23.9	1759800
Gene001034	Putative aldo-ketose reductase 1	2	1	4.4	1753500
Gene010817	Eukaryotic translation initiation factor 5	4	4	11	1742800
Gene011443	Protein CASC3 isoform X3	4	4	26.6	1720400
Gene005077	Phosphoserine aminotransferase 1	8	8	22.3	1700100
Gene000395	Vesicle-associated membrane protein-associated protein B isoform X3	10	10	48.8	1696000	U
Gene001078	Protein ERGIC-53	10	10	20	1675700
Gene015713	Carboxylesterase CarE-7	4	4	7.3	1674700
Gene002998	Guanylate-binding protein	12	12	16.5	1629300
Gene007724	DEAD-box helicase Dbp80	3	3	6.9	1609800	U
Gene011630	Eukaryotic translation initiation factor 2 alpha subunit	3	3	9.7	1604100
Gene002179	Small nuclear ribonucleoprotein polypeptide	1	1	7.5	1586900	U
Gene003240	FK506-binding protein FKBP59 homologue	3	3	7.1	1581600
Gene003346	Eukaryotic initiation factor 4B protein	4	4	8.8	1578600	U
Gene003554	Putative Uncharacterized protein	6	5	12	1574000	U
Gene006334;Gene006333	Alcohol dehydrogenase	4	4	12.8	1573900
Gene010260	Hydroxyacylglutathione hydrolase mitochondrial	1	1	4.7	1572300	U
Gene013855	Neutral alpha-glucosidase AB-like precursor	25	25	32.3	1540700
Gene015651	Serpin-4A	2	2	5.4	1529300
Gene010767	Putative uncharacterized protein	1	1	3	1516500	U
Gene013887	GI18675	1	1	4.4	1497800	U
Gene014681	Putative uncharacterized protein	12	12	8.2	1479200
Gene003616	Putative uncharacterized protein	5	5	14.8	1469900
Gene002560	Prolyl endopeptidase	3	3	7.6	1440400
Gene012197	Aliphatic nitrilase	4	4	10.5	1437200
Gene009474	Putative uncharacterized protein GLEAN_15719	2	2	2.9	1418200	U
Gene001639	Vesicle associated protein	3	3	4	1415200	U
Gene007328	Putative uncharacterized protein	1	1	4.6	1414100	U
Gene016384	AGAP003900-PA	1	1	8.2	1407800	U
Gene000708	Coatomer protein complex subunit beta 2	6	6	8	1386700
Gene003996	Trafficking protein particle complex subunit 10	1	1	2.1	1383200	U
Gene003245	UDP-galactose 4-epimerase isoform X1	7	7	23.3	1379400
Gene014001	Putative uncharacterized protein GLEAN_08444	1	1	1.4	1371900	U
Gene008798	Succinyl-coa synthetase beta chain	3	3	6.7	1367300	U
Gene002212	Putative Uncharacterized protein	6	6	12.8	1342200
Gene005109	Bifunctional purine biosynthesis protein PURH	12	12	21.3	1329500
Gene010036	Eukaryotic translation initiation factor 3 subunit D	3	3	6.4	1319400
Gene016729;Gene016181	Ribose-phosphate pyrophosphokinase	1	1	3.8	1315300	U
Gene005282	Dynein intermediate chain cytosolic	5	5	8.2	1308100
Gene016331;Gene016330	Oxidoreductase activity, acting on NADH or NADPH	3	3	15.8	1308000
Gene010350	NADH dehydrogenase (Ubiquinone) Fe-S protein 8	3	3	14.5	1306200
Gene000604	Putative uncharacterized protein	2	2	5.2	1299100	U
Gene001890	Dipeptidyl peptidase 4	2	2	4.8	1285100	U
Gene007286;Gene011520	Hemolymph protein	2	2	7.3	1283500	U
Gene002941	GK24663	3	3	2.8	1269300	U
Gene003808	Putative uncharacterized protein	4	4	4.3	1268100
Gene005575	Putative uncharacterized protein	1	1	4.2	1246100	U
Gene000312	Putative uncharacterized protein	2	2	3.8	1229600
Gene009641	Uncharacterized protein LOC101741307	17	17	56	1223800
Gene002402;Gene002401	Signal transducing adapter molecule 1	2	2	14.1	1219400	U
Gene013738	BmorCPR143	1	1	2.6	1192500	U
Gene001766	Putative uncharacterized protein	3	3	7.7	1178400
Gene005558	Ankyrin repeat-rich membrane spanning protein	1	1	0.5	1161800	U
Gene013139	Translation initiation factor 2 gamma subunit	4	4	10.3	1158400	U
Gene003836	Putative uncharacterized protein	1	1	0.8	1153000	U
Gene000368	Neutral endopeptidase 24.11	6	6	10.1	1147600
Gene002363	Putative uncharacterized protein	1	1	2.2	1138100	U
Gene004973	Glycerol-3-phosphate dehydrogenase [NAD(+)], cytoplasmic	9	9	25.7	1112900
Gene014585	Transforming acidic coiled-coil-containing protein 1	1	1	4.4	1108000	U
Gene012110	AGAP004294-PA	2	2	3.6	1090000	U
Gene010575	Ucharacterized protein LOC101742982	20	20	38.4	1089700	U
Gene006741	Eukaryotic translation initiation factor 3 subunit L	5	5	11	1088700	U
Gene000537	Hypothetical protein KGM_14041	5	5	17.1	1084300	U
Gene010671	Putative uncharacterized protein	2	2	5.2	1079200	U
Gene000992	Histone H3	7	7	20.2	1079100	U
Gene005078	Putative Uncharacterized protein SP1070	55	55	18.5	1070800
Gene010819	Echinoderm microtubule-associated protein-like 1	4	4	7	1066900
Gene010983	Aldehyde dehydrogenase isoform 2	15	15	32.4	1051200
Gene015146	Putative uncharacterized protein	4	4	4.7	1031900
Gene013576	Putative uncharacterized protein	2	2	8.8	1025300	U
Gene011720	Glucose-6-phosphate isomerase	5	5	9.9	1024900
Gene009126	Putative uncharacterized protein	1	1	2.2	1023800	U
Gene016474	GF16408	2	2	2.3	1018200	U
Gene010854	GK16235	3	3	13.6	1014000	U
Gene013515	Carboxylesterase	6	6	9.9	1001800	U
Gene010576	Dual specificity protein kinase splB-like	18	18	32.2	949680	U
Gene005027	Putative uncharacterized protein	2	2	8.3	948520	U
Gene014664	Tryptophanyl-tRNA synthetase putative	2	2	8	945240
Gene000354	Putative uncharacterized protein	4	4	11.6	933790
Gene015181	GA17230	4	4	4.6	929740
Gene000802	GM19865	2	2	4.7	916980
Gene016125	Putative uncharacterized protein	6	6	5.3	903270
Gene001898;Gene001897	Glucose-6-phosphate 1-dehydrogenase	5	5	7.5	886970
Gene002620	GI17660	3	3	6.2	852950	U
Gene013741	Adhesion related protein transmembrane	4	4	7	845040
Gene008890	Putative uncharacterized protein	3	3	6.6	842220
Gene014465	Ribosome-binding protein 1 isoform X1	20	20	28.1	838410
Gene015785	Elongation factor 1 alpha	5	5	7.6	836880
Gene001084	Talin-1	1	1	1	835160	U
Gene012723	Nopp140 isoform B	1	1	2.4	825300	U
Gene010278	Eukaryotic translation initiation factor 3 subunit B	5	5	7.5	813420	U
Gene010963	Threonyl-tRNA synthetase	4	4	5.5	810770	U
Gene015171	AGAP007871-PA	4	4	13.3	782110
Gene009469	Putative uncharacterized protein	3	3	4.6	779700	U
Gene016113	Type IV collagen	5	5	7.4	773510	U
Gene008707	CTL-like protein 2	2	2	2.8	767480	U
Gene000797	Putative uncharacterized protein	4	4	7.9	763980	U
Gene000209;Gene000208;Gene001388	Vacuolar ATP synthase subunit D	8	8	18.5	763290
Gene009853	Putative uncharacterized protein	3	3	5.7	752510
Gene016323	Fibrillin-2	3	3	8.6	746730	U
Gene005753	Low-density lipoprotein receptor-related protein 2 isoform X1	12	12	27.2	714060	U
Gene002384	Karyopherin alpha 3	4	4	7.9	713020	U
Gene006025	Lron regulatory protein 1	4	4	4.4	709990
Gene003768	Phosphatidylinositol-binding clathrin assembly protein	2	2	4	705380	U
Gene000277	Tyrosine hydroxylase	2	2	3.2	695540	U
Gene006316	Low-density lipoprotein receptor putative	46	46	12.1	690560
Gene001161	Lark-PA	5	5	16.9	685800	U
Gene008123	ADP-ribosylation factor GTPase-activating proteinputative	3	3	8.2	679790
Gene008459;Gene008458	AGAP004366-PA	12	12	22.7	671870
Gene010959	Hemocyte protein-glutamine gamma-glutamyltransferase	1	1	1.3	670530	U
Gene001085	Putative uncharacterized protein	1	1	1.7	666420	U
Gene008945	Putative uncharacterized protein	2	2	3.2	663980	U
Gene005624	Notch-like protein	22	22	22.8	656340
Gene008574	Putative uncharacterized protein	1	1	2.8	639520	U
Gene016324	Putative uncharacterized protein	4	4	5.3	638860
Gene014807	Aminopeptidase N-like protein	8	8	7.6	610910
Gene012718	Putative uncharacterized protein	1	1	2.4	586010	U
Gene005437	Hypothetical protein KGM_09916 [	20	20	12.8	579050
Gene010155	Putative uncharacterized protein	1	1	3.2	574210	U
Gene014100	Dynactin	3	3	3.6	572640	U
Gene008849	Nicastrin	2	2	3.7	555860	U
Gene007290	GH18428	3	3	3	543130
Gene012543	Hypothetical protein KGM_12128	16	14	17.1	541450
Gene008611	Kynurenine aminotransferase	2	2	3.7	530610	U
Gene008974	Putative uncharacterized protein	6	6	5	514030	U
Gene011956	Endoprotease FURIN	3	3	2.5	509150
Gene015505	Similar to CG8399	6	6	12.8	486330	U
Gene003525;Gene003524	Vacuolar protein sorting 4	5	5	11.6	474250	U
Gene003955	Pixie	3	3	5.6	457090	U
Gene008381	Putative Uncharacterized protein	11	11	12.7	442410	U
Gene013567	Putative fatty acyl-CoA reductase CG8306	20	20	45.9	441810	U
Gene005333	Lntegrin alpha 2	2	2	1.8	394590
Gene005456	Sarco/endoplasmic reticulum calcium ATPase	13	13	13.3	388340	U
Gene013840	Putative uncharacterized protein (Fragment)	6	6	9.4	383480
Gene007694;Gene007693	Laminin	8	8	6.3	366550	U
Gene007686	Cysteinyl-tRNA synthetase	2	2	4.4	350120	U
Gene002683	Cullin-associated NEDD8-dissociated protein 1	2	2	1.4	342040
Gene015533	Putative uncharacterized protein	3	3	1.8	298290
Gene005676	Lntegrin beta	1	1	1.7	203830	U
Gene012100	Dynein heavy chain	7	7	6.4	165890
Gene004619	Huntingtin-interacting protein putative	13	13	10.1	131280	U
Gene014179	Spectrin beta chainnputative	44	44	11.8	129730
Gene010702	GJ16390	5	5	4.9	93820	U
Gene012099	Dynein heavy chain	9	9	3.1	76984
Gene000107	Laminin A chainputative	7	7	2.3	61568	U
Red colored proteins in column B are identified as cuticular protein.
* The proteins classified as unreliable are indicated by "U" in column G.
** Transcript levels (EST counts) were obtained from EST database of KAIKObase (https://sgp.dna.affrc.go.jp/KAIKObase/).
