# Supplementary material for: Lepidopteran wing scales contain abundant cross-linked film-forming histidine-rich cuticular proteins
Source: Commun Biol. 2021 Apr 22;4:491. doi: 10.1038/s42003-021-01996-4 (PMC8062583; doi:10.1038/s42003-021-01996-4)
Supplement: Supplementary file 8 — Supplementary Data 5 [file 42003_2021_1996_MOESM8_ESM.xlsx]

## Sheet: 工作表1
Supplementary Data 5. Source data of Figure 2.
Figure 2A. RT-qPCR raw data
sample name	Ref gene	Ct	Mean Ct GOI	△Ct
si_BmorCPR152-1	SWU22934	16.68	15.86	0.82
si_BmorCPR152-2	SWU22934	16.55	15.86	0.69
si_BmorCPR152-3	SWU22934	16.61	15.86	0.75
si_BmorCPR152-4	SWU22934	16.65	15.67	0.98
si_BmorCPR152-5	SWU22934	16.69	15.67	1.02
si_BmorCPR152-6	SWU22934	16.74	15.67	1.07
si_BmorCPR152-7	SWU22934	16.91	15.88	1.03
si_BmorCPR152-8	SWU22934	16.81	15.88	0.93
si_BmorCPR152-9	SWU22934	16.83	15.88	0.95
GFP_BmorCPR152-1	SWU22934	17.21	17.16	0.05
GFP_BmorCPR152-2	SWU22934	17.33	17.16	0.17
GFP_BmorCPR152-3	SWU22934	17.28	17.16	0.12
GFP_BmorCPR152-4	SWU22934	17.49	17.02	0.47
GFP_BmorCPR152-5	SWU22934	17.09	17.02	0.07
GFP_BmorCPR152-6	SWU22934	17.04	17.02	0.02
GFP_BmorCPR152-7	SWU22934	17.38	17.48	-0.1
GFP_BmorCPR152-8	SWU22934	17.63	17.48	0.15
GFP_BmorCPR152-9	SWU22934	17.09	17.48	-0.39
si_BmorCPR82-1	SWU22934	21.0726	20.8773	0.195286
si_BmorCPR82-2	SWU22934	20.6027	20.8773	-0.274647
si_BmorCPR82-3	SWU22934	20.2153	20.8773	-0.661964
si_BmorCPR82-4	SWU22934	20.0417	20.7367	-0.695055
si_BmorCPR82-5	SWU22934	20.3711	20.7367	-0.365667
si_BmorCPR82-6	SWU22934	20.6714	20.7367	-0.0653591
si_BmorCPR82-7	SWU22934	19.8424	20.3828	-0.540373
si_BmorCPR82-8	SWU22934	19.6654	20.3828	-0.717415
si_BmorCPR82-9	SWU22934	19.6434	20.3828	-0.739393
GFP_BmorCPR82-1	SWU22934	21.9692	18.8421	3.12709
GFP_BmorCPR82-2	SWU22934	21.9309	18.8421	3.08881
GFP_BmorCPR82-3	SWU22934	21.8271	18.8421	2.98502
GFP_BmorCPR82-4	SWU22934	22.0239	19.2003	2.82356
GFP_BmorCPR82-5	SWU22934	22.0925	19.2003	2.89218
GFP_BmorCPR82-6	SWU22934	22.0469	19.2003	2.84662
GFP_BmorCPR82-7	SWU22934	22.3505	19.5406	2.80998
GFP_BmorCPR82-8	SWU22934	22.1146	19.5406	2.57407
GFP_BmorCPR82-9	SWU22934	22.1547	19.5406	2.61417
si_BmorCPR57-1	SWU22934	17.67	20.18	-2.51
si_BmorCPR57-2	SWU22934	17.83	20.18	-2.35
si_BmorCPR57-3	SWU22934	17.95	20.18	-2.23
si_BmorCPR57-4	SWU22934	17.38	20.07	-2.69
si_BmorCPR57-5	SWU22934	17.37	20.07	-2.7
si_BmorCPR57-6	SWU22934	17.5	20.07	-2.57
si_BmorCPR57-7	SWU22934	16.66	19.17	-2.51
si_BmorCPR57-8	SWU22934	16.68	19.17	-2.49
si_BmorCPR57-9	SWU22934	16.75	19.17	-2.42
GFP_BmorCPR57-10	SWU22934	18.61	19.76	-1.15
GFP_BmorCPR57-11	SWU22934	17.92	19.76	-1.84
GFP_BmorCPR57-12	SWU22934	18.45	19.76	-1.31
GFP_BmorCPR57-13	SWU22934	17.9235	18.8227	-0.899197
GFP_BmorCPR57-14	SWU22934	17.6521	18.8227	-1.17067
GFP_BmorCPR57-15	SWU22934	17.3112	18.8227	-1.51153
GFP_BmorCPR57-16	SWU22934	17.3503	18.7788	-1.42847
GFP_BmorCPR57-17	SWU22934	17.3791	18.7788	-1.39968
GFP_BmorCPR57-18	SWU22934	17.3038	18.7788	-1.47503
si_BmorCPR129-1	SWU22934	19.1918	21.7671	-2.57538
si_BmorCPR129-2	SWU22934	19.1334	21.7671	-2.63373
si_BmorCPR129-3	SWU22934	19.3015	21.7671	-2.46564
si_BmorCPR129-4	SWU22934	18.5145	21.3305	-2.81603
si_BmorCPR129-5	SWU22934	18.983	21.3305	-2.34757
si_BmorCPR129-6	SWU22934	19.4815	21.3305	-1.84899
si_BmorCPR129-7	SWU22934	19.8	22.35	-2.55
si_BmorCPR129-8	SWU22934	19.9	22.35	-2.45
si_BmorCPR129-9	SWU22934	19.79	22.35	-2.56
GFP_BmorCPR129-1	SWU22934	19.27	20.79	-1.52
GFP_BmorCPR129-2	SWU22934	19.5	20.79	-1.29
GFP_BmorCPR129-3	SWU22934	19.37	20.79	-1.42
GFP_BmorCPR129-4	SWU22934	19.11	20.05	-0.94
GFP_BmorCPR129-5	SWU22934	19.02	20.05	-1.03
GFP_BmorCPR129-6	SWU22934	18.94	20.05	-1.11
GFP_BmorCPR129-7	SWU22934	19.5005	20.5177	-1.0172
GFP_BmorCPR129-8	SWU22934	19.5767	20.5177	-0.940992
GFP_BmorCPR129-9	SWU22934	19.6313	20.5177	-0.8864
si-Bmlac2A-1	SWU22934	20.8136	19.1704	1.64314
si-Bmlac2A-2	SWU22934	20.8642	19.1704	1.69377
si-Bmlac2A-3	SWU22934	20.9268	19.1704	1.75635
si-Bmlac2A-4	SWU22934	20.7454	19.4796	1.26582
si-Bmlac2A-5	SWU22934	20.932	19.4796	1.45249
si-Bmlac2A-6	SWU22934	21.1965	19.4796	1.71695
si-Bmlac2A-7	SWU22934	21.9802	19.7012	2.27901
si-Bmlac2A-8	SWU22934	21.5756	19.7012	1.87447
si-Bmlac2A-9	SWU22934	21.8916	19.7012	2.19045
GFP-Bmlac2A-1	SWU22934	23.336	20.3256	3.01034
GFP-Bmlac2A-2	SWU22934	23.1186	20.3256	2.79297
GFP-Bmlac2A-3	SWU22934	23.2571	20.3256	2.9315
GFP-Bmlac2A-4	SWU22934	22.7051	20.2089	2.49623
GFP-Bmlac2A-5	SWU22934	22.7565	20.2089	2.54759
GFP-Bmlac2A-6	SWU22934	22.9362	20.2089	2.72731
GFP-Bmlac2A-7	SWU22934	23.3299	20.3517	2.9782
GFP-Bmlac2A-8	SWU22934	22.9605	20.3517	2.60872
GFP-Bmlac2A-9	SWU22934	22.8398	20.3517	2.48809
Figure 2b. Percent of abnormal scales from each examined wing after RNAi
sample name	Number of abnormal individual	Number of exmamed scale in individual	Percent of abnormal wing scales (%)
si-GFP_1	0	20	0
si-GFP_2	2	20	10
si-GFP_3	1	20	5
si-GFP_4	3	20	15
si-GFP_5	3	20	15
si-GFP_6	1	20	5
si-GFP_7	3	20	15
si-GFP_8	2	20	10
si-GFP_9	1	20	5
si-BmorCPR152_1	11	20	55
si-BmorCPR152_2	1	20	5
si-BmorCPR152_3	15	20	75
si-BmorCPR152_4	7	20	35
si-BmorCPR152_5	11	20	55
si-BmorCPR152_6	10	20	50
si-BmorCPR152_7	20	20	100
si-BmorCPR152_8	12	20	60
si-BmorCPR152_9	17	20	85
si-BmorCPR82_1	15	20	75
si-BmorCPR82_2	9	20	45
si-BmorCPR82_3	14	20	70
si-BmorCPR82_4	20	20	100
si-BmorCPR82_5	7	20	35
si-BmorCPR82_6	8	20	40
si-BmorCPR82_7	18	20	90
si-BmorCPR82_8	17	20	85
si-BmorCPR82_9	20	20	100
si-BmorCPR57_1	18	20	90
si-BmorCPR57_2	1	20	5
si-BmorCPR57_3	12	20	60
si-BmorCPR57_4	12	20	60
si-BmorCPR57_5	18	20	90
si-BmorCPR57_6	17	20	85
si-BmorCPR57_7	18	20	90
si-BmorCPR57_8	20	20	100
si-BmorCPR57_9	1	20	5
si-BmorCPR129_1	3	20	15
si-BmorCPR129_2	20	20	100
si-BmorCPR129_3	9	20	45
si-BmorCPR129_4	19	20	95
si-BmorCPR129_5	18	20	90
si-BmorCPR129_6	3	20	15
si-BmorCPR129_7	3	20	15
si-BmorCPR129_8	20	20	100
si-BmorCPR129_9	2	20	10
si-Bmlac2A-1	10	20	50
si-Bmlac2A-2	13	20	65
si-Bmlac2A-3	7	20	35
si-Bmlac2A-4	17	20	85
si-Bmlac2A-5	12	20	60
si-Bmlac2A-6	17	20	85
si-Bmlac2A-7	16	20	80
si-Bmlac2A-8	16	20	80
si-Bmlac2A-9	2	20	10
Figure 2c. Percent of abnormal wings in each group after RNAi
	Number of abnormal individuasls	Number of scamples in each group	Percent of abnormal wings
si-GFP_G1	0	10	0
si-GFP_G2	2	10	20
si-GFP_G3	1	10	10
si-BmorCPR152-G1	0	10	0
si-BmorCPR152-G2	2	10	20
si-BmorCPR152-G3	1	10	10
si-BmorCPR82-G1	2	10	20
si-BmorCPR82-G2	1	10	10
si-BmorCPR82-G3	1	10	10
si-BmorCPR57-G1	5	10	50
si-BmorCPR57-G2	7	10	70
si-BmorCPR57-G3	7	10	70
si-BmorCPR129-G1	4	10	40
si-BmorCPR129-G2	7	10	70
si-BmorCPR129-G3	5	10	50
si-Bmlac2A-G1	5	10	50
si-Bmlac2A-G2	5	10	50
si-Bmlac2A-G3	4	10	40
