# Supplementary material for: Lepidopteran wing scales contain abundant cross-linked film-forming histidine-rich cuticular proteins
Source: Commun Biol. 2021 Apr 22;4:491. doi: 10.1038/s42003-021-01996-4 (PMC8062583; doi:10.1038/s42003-021-01996-4)
Supplement: Supplementary file 9 — Supplementary Data 6 [file 42003_2021_1996_MOESM9_ESM.xlsx]

## Sheet: 工作表1
Supplementary Data 6. Source data of Supplementary Figure 6.
Supplementary Figure 6a. Percent of abnormal body scales in individuals after RNAi treatment
Targeted gene	Number of abnormal individuals	Number of examined scales in individual	Percent of abnormal body scales
si-GFP_1	1	10	10
si-GFP_2	0	10	0
si-GFP_3	1	10	10
si-GFP_4	1	10	10
si-GFP_5	0	10	0
si-GFP_6	1	10	10
si-GFP_7	3	10	30
si-GFP_8	1	10	10
si-GFP_9	1	10	10
si-BmorCPR152_1	7	10	70
si-BmorCPR152_2	7	10	70
si-BmorCPR152_3	7	10	70
si-BmorCPR152_4	8	10	80
si-BmorCPR152_5	6	10	60
si-BmorCPR152_6	5	10	50
si-BmorCPR152_7	6	10	60
si-BmorCPR152_8	5	10	50
si-BmorCPR152_9	6	10	60
si-BmorCPR82_1	7	10	70
si-BmorCPR82_2	10	10	100
si-BmorCPR82_3	7	10	70
si-BmorCPR82_4	8	10	80
si-BmorCPR82_5	5	10	50
si-BmorCPR82_6	9	10	90
si-BmorCPR82_7	5	10	50
si-BmorCPR82_8	10	10	100
si-BmorCPR82_9	9	10	90
si-BmorCPR57_1	6	10	60
si-BmorCPR57_2	10	10	100
si-BmorCPR57_3	8	10	80
si-BmorCPR57_4	6	10	60
si-BmorCPR57_5	5	10	50
si-BmorCPR57_6	7	10	70
si-BmorCPR57_7	9	10	90
si-BmorCPR57_8	7	10	70
si-BmorCPR57_9	8	10	80
si-BmorCPR129_1	6	10	60
si-BmorCPR129_2	8	10	80
si-BmorCPR129_3	8	10	80
si-BmorCPR129_4	8	10	80
si-BmorCPR129_5	6	10	60
si-BmorCPR129_6	10	10	100
si-BmorCPR129_7	8	10	80
si-BmorCPR129_8	8	10	80
si-BmorCPR129_9	9	10	90
si-Bmlac2A-1	8	10	80
si-Bmlac2A-2	7	10	70
si-Bmlac2A-3	4	10	40
si-Bmlac2A-4	2	10	20
si-Bmlac2A-5	5	10	50
si-Bmlac2A-6	7	10	70
si-Bmlac2A-7	0	10	0
si-Bmlac2A-8	8	10	80
si-Bmlac2A-9	6	10	60
Supplementary Figure 6b. Percent of abnormal leg scales in individuals after RNAi treatment
Targeted gene	Number of abnormal individuals	Number of examined scales in individual	Percent of abnormal leg scales
si-GFP_1	0	10	0
si-GFP_2	0	10	0
si-GFP_3	2	10	20
si-GFP_4	2	10	20
si-GFP_5	0	10	0
si-GFP_6	0	10	0
si-GFP_7	0	10	0
si-GFP_8	0	10	0
si-GFP_9	1	10	10
si-BmorCPR152_1	8	10	80
si-BmorCPR152_2	7	10	70
si-BmorCPR152_3	6	10	60
si-BmorCPR152_4	7	10	70
si-BmorCPR152_5	7	10	70
si-BmorCPR152_6	5	10	50
si-BmorCPR152_7	6	10	60
si-BmorCPR152_8	5	10	50
si-BmorCPR152_9	6	10	60
si-BmorCPR82_1	8	10	80
si-BmorCPR82_2	9	10	90
si-BmorCPR82_3	6	10	60
si-BmorCPR82_4	5	10	50
si-BmorCPR82_5	6	10	60
si-BmorCPR82_6	8	10	80
si-BmorCPR82_7	8	10	80
si-BmorCPR82_8	5	10	50
si-BmorCPR82_9	3	10	30
si-BmorCPR57_1	3	10	30
si-BmorCPR57_2	7	10	70
si-BmorCPR57_3	7	10	70
si-BmorCPR57_4	8	10	80
si-BmorCPR57_5	5	10	50
si-BmorCPR57_6	2	10	20
si-BmorCPR57_7	1	10	10
si-BmorCPR57_8	4	10	40
si-BmorCPR57_10	8	10	80
si-BmorCPR57_11	7	10	70
si-BmorCPR57_12	6	10	60
si-BmorCPR57_13	5	10	50
si-BmorCPR57_14	5	10	50
si-BmorCPR57_15	6	10	60
si-BmorCPR57_16	5	10	50
si-BmorCPR57_17	5	10	50
si-BmorCPR57_18	2	10	20
si-BmorCPR57_19	5	10	50
si-Bmlac2A-1	4	10	40
si-Bmlac2A-2	5	10	50
si-Bmlac2A-3	3	10	30
si-Bmlac2A-4	3	10	30
si-Bmlac2A-5	5	10	50
si-Bmlac2A-6	4	10	40
si-Bmlac2A-7	4	10	40
si-Bmlac2A-8	5	10	50
si-Bmlac2A-9	3	10	30
